# Supplementary material
Source: PubMed Central journal article supplement (PMC2792888)
Supplement: NIHMS161758-supplement-Suppl_1.pdf [file NIHMS161758-supplement-Suppl_1.pdf]

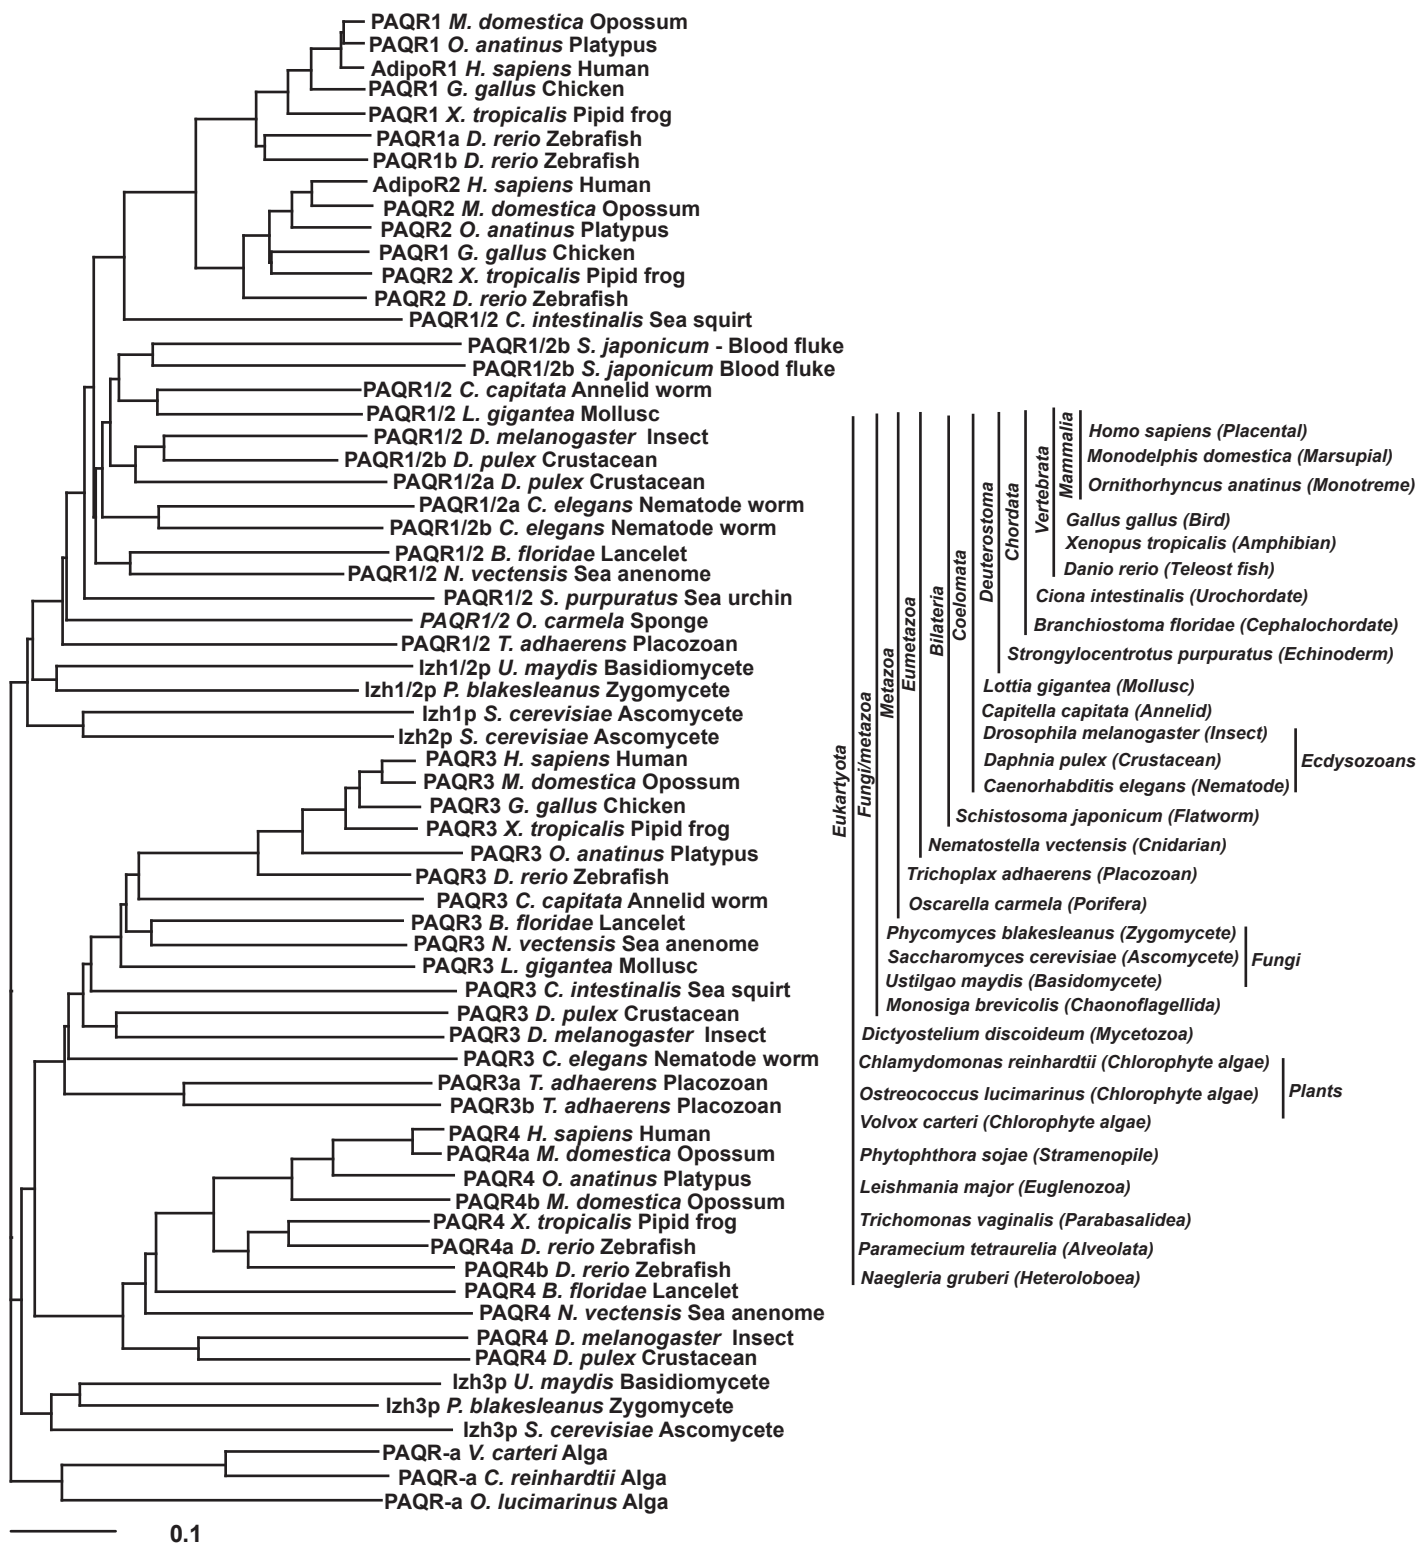

**Supplemental Figure 1: Phylogenetic tree of Class I PAQRs.** The tree is rooted with PAQR sequences from chlorophyte plants. On the right is a taxonomic key to the organisms from which these sequences and those in **Figure 4** were derived.
