# Supplementary material
Source: PubMed Central journal article supplement (PMC2792888)
Supplement: NIHMS161758-supplement-Suppl_2.pdf [file NIHMS161758-supplement-Suppl_2.pdf]

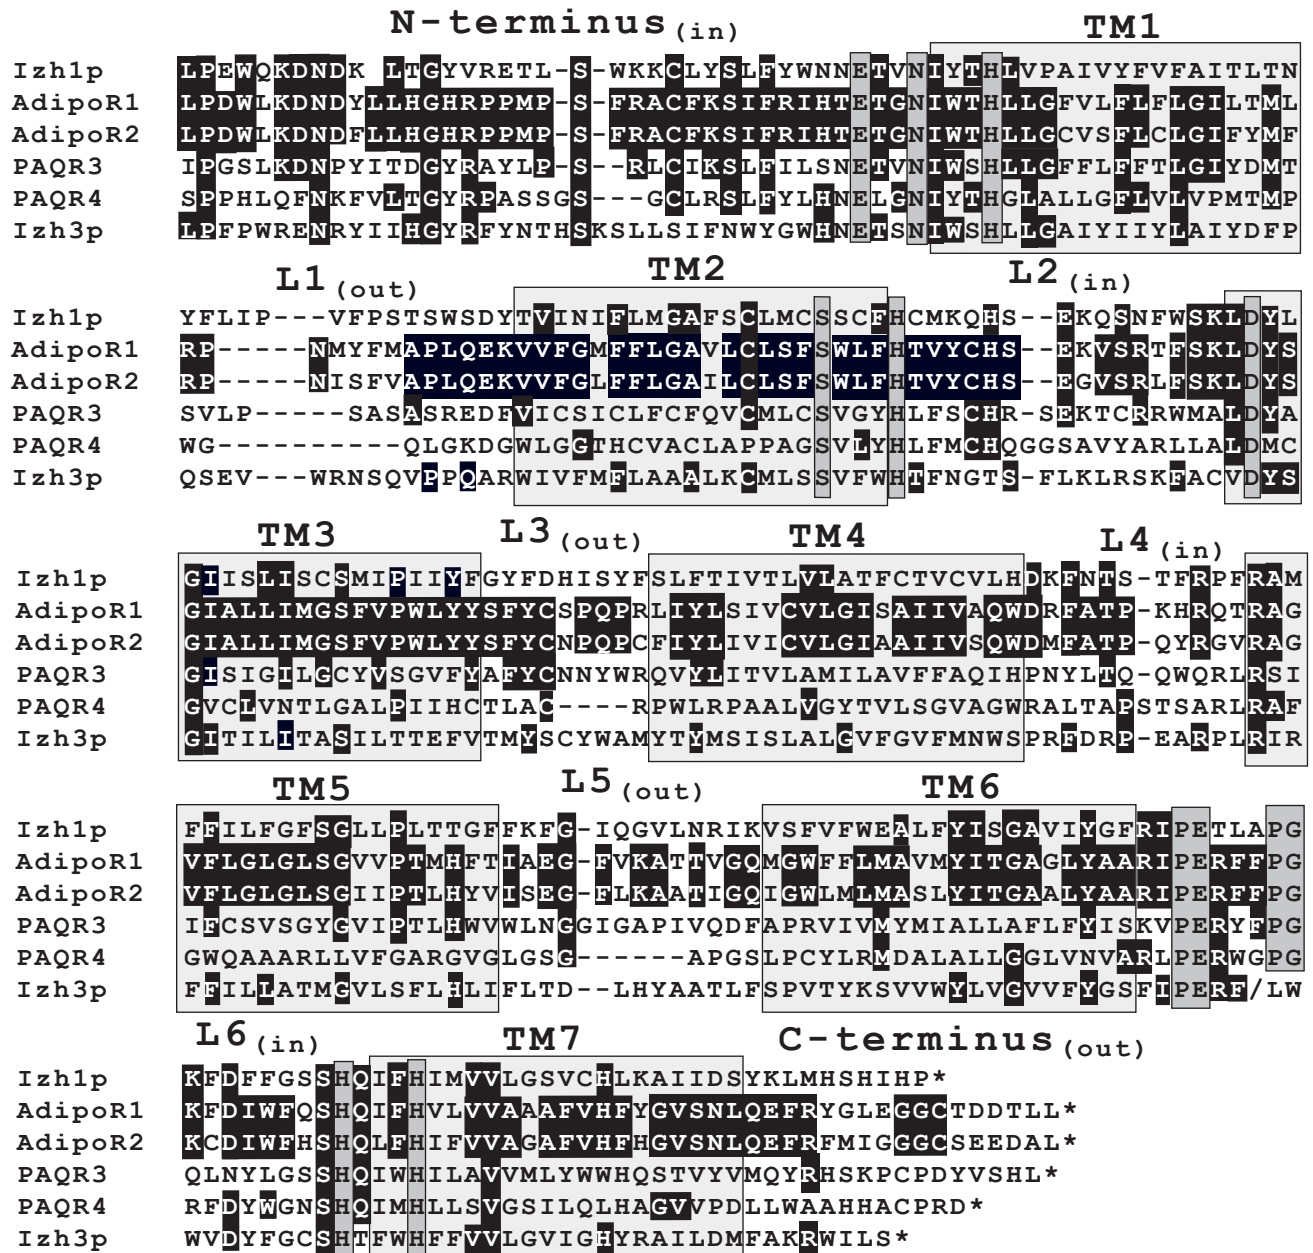

**Supplemental Figure 2: Multiple sequence alignment of human and yeast Class I PAQRs.** Grey shading indicates amino acids that are highly conserved throughout the entire PAQR family. Black shading indicates amino acids that are conserved in AdipoR1 and AdipoR2. Boxes indicate the positions of transmembrane domains (TM). The topological placement of the loop regions (L) is shown.
