# Supplementary material
Source: PubMed Central journal article supplement (PMC2792888)
Supplement: NIHMS161758-supplement-Suppl_3.pdf [file NIHMS161758-supplement-Suppl_3.pdf]

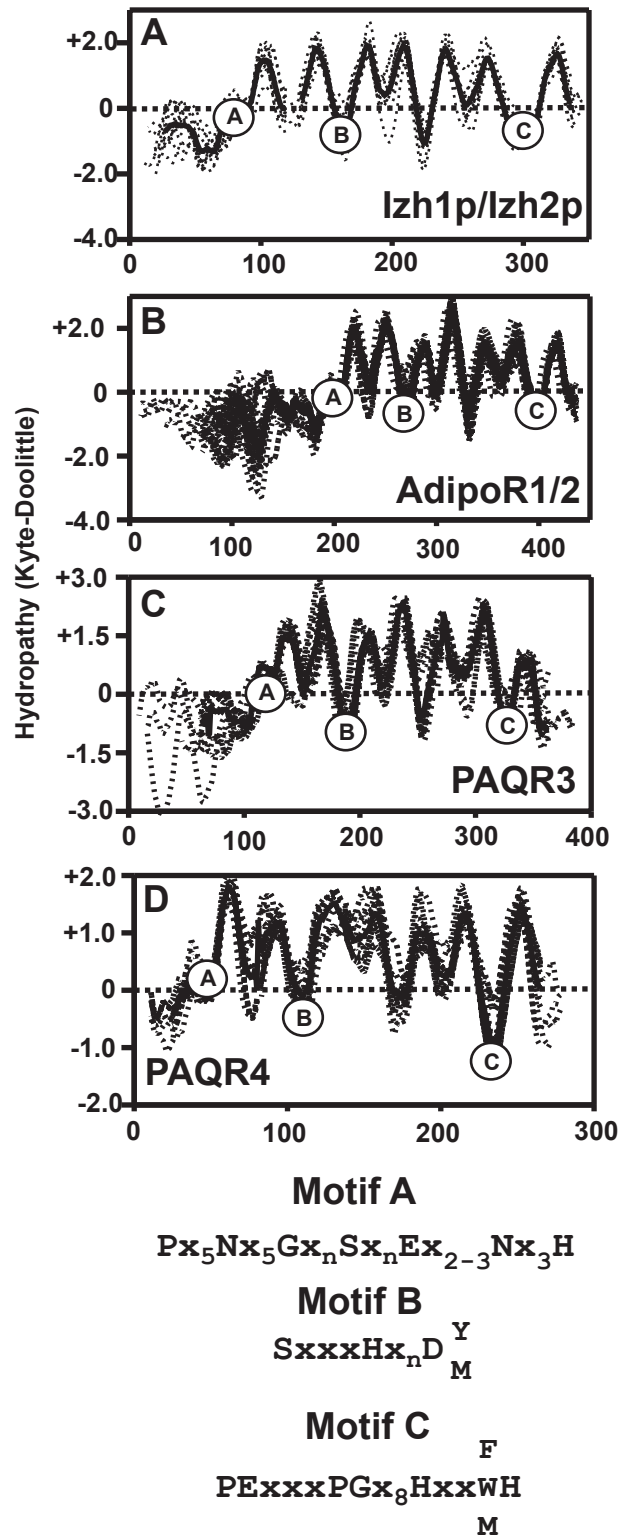

**Supplemental Figure 3. Hydropathy plots for yeast and human Class I PAQRs. (A-D)** Hydropathy plots for various individual proteins from different groups were generated and aligned (dotted lines). An average hydropathy plot for all members of each group were generated (solid lines). **(A)** Fungal Izh2p-like proteins. **(B)** Vertebrate AdipoR1/2-like proteins. **(C)** Vertebrate PAQR3-like proteins. **(D)** Vertebrate PAQR4-like proteins. **(E)** A topological model for all PAQRs with the positions of the three conserved motifs.
